# Supplementary material for: Loss of aPKCλ in Differentiated Neurons Disrupts the Polarity Complex but Does Not Induce Obvious Neuronal Loss or Disorientation in Mouse Brains
Source: PubMed Central journal article supplement (PMC3877147; doi:10.1371/journal.pone.0084036), 2013-12-31
Supplement: pone.0084036.s003.pdf [file pone.0084036.s003.pdf]

**Table S1. Born ratio of aPKC $\lambda$  C2-cko mice.**

| aPKC $\lambda$ flox/flox x aPKC $\lambda$ flox/+; C2-cre |     |       |      |       |        |       |                |
|----------------------------------------------------------|-----|-------|------|-------|--------|-------|----------------|
|                                                          | All |       | Male |       | Female |       | Expected ratio |
|                                                          | No  | Ratio | No   | Ratio | No     | Ratio |                |
| flox/flox; C2-cre                                        | 24  | 24.5  | 11   | 21.6  | 13     | 27.7  | 25             |
| flox/+; C2-cre                                           | 24  | 24.5  | 15   | 29.4  | 9      | 19.1  | 25             |
| flox/flox                                                | 24  | 24.5  | 13   | 25.5  | 11     | 23.4  | 25             |
| flox/+                                                   | 26  | 26.5  | 12   | 23.5  | 14     | 29.8  | 25             |
