# Supplementary material for: Loss of aPKCλ in Differentiated Neurons Disrupts the Polarity Complex but Does Not Induce Obvious Neuronal Loss or Disorientation in Mouse Brains
Source: PubMed Central journal article supplement (PMC3877147; doi:10.1371/journal.pone.0084036), 2013-12-31
Supplement: pone.0084036.s004.pdf [file pone.0084036.s004.pdf]

**Table S2. Born ratio of aPKC $\lambda$  S1-cko mice.**

| aPKC $\lambda$ flox/flox x aPKC $\lambda$ flox/+(-); S1-cre* |     |       |      |       |        |       |                |
|--------------------------------------------------------------|-----|-------|------|-------|--------|-------|----------------|
|                                                              | All |       | Male |       | Female |       | Expected ratio |
|                                                              | No  | Ratio | No   | Ratio | No     | Ratio |                |
| flox/flox; S1-cre<br>(or flox/-; S1-cre) <sup>†</sup>        | 30  | 35.7  | 11   | 32.3  | 19     | 38.0  | 25             |
| flox/+; S1-cre<br>(or +/-; S1-cre) <sup>†</sup>              | 19  | 22.6  | 8    | 23.5  | 11     | 22.0  | 25             |
| flox/flox (or flox/-) <sup>†</sup>                           | 19  | 22.6  | 8    | 23.5  | 11     | 22.0  | 25             |
| flox/+                                                       | 16  | 19.0  | 7    | 20.5  | 9      | 18.0  | 25             |

\*The (-) means deleted allele of aPKC $\lambda$  detected in some mice when crossed with S1-cre possibly due to its recombination in germline. <sup>†</sup>Mice with aPKC $\lambda$  deleted allele (-) instead of flox allele were occasionally obtained during generation.
