# Supplementary material for: Loss of aPKCλ in Differentiated Neurons Disrupts the Polarity Complex but Does Not Induce Obvious Neuronal Loss or Disorientation in Mouse Brains
Source: PubMed Central journal article supplement (PMC3877147; doi:10.1371/journal.pone.0084036), 2013-12-31
Supplement: pone.0084036.s005.pdf [file pone.0084036.s005.pdf]

**Table S3. Quantification of anti-NeuN stained cells in brain cortex.**

|        | Genotype                         | Age       | NeuN-positive cells* |       |       | Ratio to control |
|--------|----------------------------------|-----------|----------------------|-------|-------|------------------|
|        |                                  |           | Left                 | Right | Mean  |                  |
| Cont   | aPKC $\lambda$ flox/+            | 7 months  | 697                  | 713   | 705   |                  |
| S1-cko | aPKC $\lambda$ flox/-; S1-cre    | 7 months  | 703                  | 703   | 703   | 0.997            |
| Cont   | aPKC $\lambda$ flox/+            | 18 months | 735                  | 699   | 717   |                  |
| S1-cko | aPKC $\lambda$ flox/flox; S1-cre | 18 months | 658                  | 717   | 687.5 | 0.959            |
| Cont   | aPKC $\lambda$ flox/+; C2-cre    | 15 months | 766                  | 666   | 716   |                  |
| C2-cko | aPKC $\lambda$ flox/flox; C2-cre | 15 months | 736                  | 643   | 689.5 | 0.963            |
| Cont   | aPKC $\lambda$ flox/+            | 26 months | 738                  | 737   | 737.5 |                  |
| C2-cko | aPKC $\lambda$ flox/flox; C2-cre | 26 months | 735                  | 749   | 742   | 1.006            |

\*Coronal sections of indicated control or aPKC $\lambda$  deletion mice were stained with anti-NeuN. The NeuN-positive cells in all layers of cortex (600  $\mu$ m in width) in left and right hemisphere were quantified. Mean cell number and ratio to control for each pair were also indicated.
