# Supplementary material for: Loss of aPKCλ in Differentiated Neurons Disrupts the Polarity Complex but Does Not Induce Obvious Neuronal Loss or Disorientation in Mouse Brains
Source: PubMed Central journal article supplement (PMC3877147; doi:10.1371/journal.pone.0084036), 2013-12-31
Supplement: pone.0084036.s006.pdf [file pone.0084036.s006.pdf]

**Table S4. List of primers used for genotyping.**

| Genotype                   | Primer forward |                           | Primer reverse |                           |
|----------------------------|----------------|---------------------------|----------------|---------------------------|
| aPKC $\lambda$<br>WT, Flox | flox-L62       | CATGCAGTGTACTGGCATAGCCACC | flox-L64       | AGAGGCAGCCAAAGCCCTGCTCTCC |
| aPKC $\lambda$ Del         | del-L57        | GTCGTCTGTGTGCCTGCCGTAAGT  | del-L63        | CAAAGCCCTGCTCTCCTAGAGCCTG |
| Cre                        | cre-fw         | AGATGTTTCGCGATTATC        | cre-rv         | AGCTACACCAGAGACGG         |
| RNZ WT                     | R523           | GGAGCGGGAGAAATGGATATG     | R26F2          | AAAGTCGCTCTGAGTTGTTAT     |
| RNZ KI                     | R1295          | GCGAAGAGTTTGTCTCAACC      | R26F2          | AAAGTCGCTCTGAGTTGTTAT     |
