# Supplementary material for: Loss of aPKCλ in Differentiated Neurons Disrupts the Polarity Complex but Does Not Induce Obvious Neuronal Loss or Disorientation in Mouse Brains
Source: PubMed Central journal article supplement (PMC3877147; doi:10.1371/journal.pone.0084036), 2013-12-31
Supplement: pone.0084036.s007.pdf [file pone.0084036.s007.pdf]

**Table S5. List of primers used for quantitative RT-PCR.**

|                 | Forward                  | Reverse                |
|-----------------|--------------------------|------------------------|
| aPKC $\lambda$  | CGGTGGAGAAAGCTGTATTGTG   | TGGGCGCGCCTATTGA       |
| aPKC $\zeta$ RD | GCATGCCTTGTCCTGGAGAA     | CGGTACAGCTTCCTCCATCTTC |
| aPKC $\zeta$ KD | CTGGGTGTCCTTATGTTTGAGATG | GTCAGGGTTGTCCGTGATGAT  |
| GAPDH           | TGTGTCCGTCGTGGATCTGA     | CCTGCTTCACCACCTTCTTGA  |
| GFAP            | CCAGCTTCGAGCCAAGGA       | GAAGCTCCGCCTGGTAGACA   |
| Lgl-1           | GGCCAGGGCTTTTACTTGATT    | TGTGATGTTGCGAGCACTCA   |
| PAR-3           | TGCGCGTGTCATTTGGTT       | CTCGCGTTGGGACAGTTGT    |
| PAR-6 $\alpha$  | CAACAGCCACAACCTCATCGT    | GCCCCCGTACCACATTAT     |
| PAR-6 $\beta$   | AACAGCCGCAACCTCATCA      | TTGCGCACCCACGTTGTTC    |
